# Supplementary material for: The solvatochromic, spectral, and geometrical properties of nifenazone: a DFT/TD-DFT and experimental study
Source: Royal Society of Chemistry journal article supplement (doi:10.1039/c4cp01679c), 2014-01-01
Supplement: c4cp01679c1.pdf [file c4cp01679c1.pdf]

*Supplementary Data*

**Solvatochromic, Spectral, and Geometrical Properties of Nifenazone: A DFT/TD-DFT and Experimental Study**

Abdulilah Dawoud Bani-Yaseen \* <sup>(1)</sup>, Mona Al-Balawi <sup>(2)</sup>

<sup>(1)</sup> Department of Chemistry & Earth Sciences, College of Arts & Sciences, Qatar University,  
P.O. Box: 2713, Doha, State of Qatar

*abdulilah.baniyaseen@qu.edu.qa*

<sup>(2)</sup> Department of Chemistry, Faculty of Science, Taibah University  
Al-Madinah Al-Munawwarah, Saudi Arabia

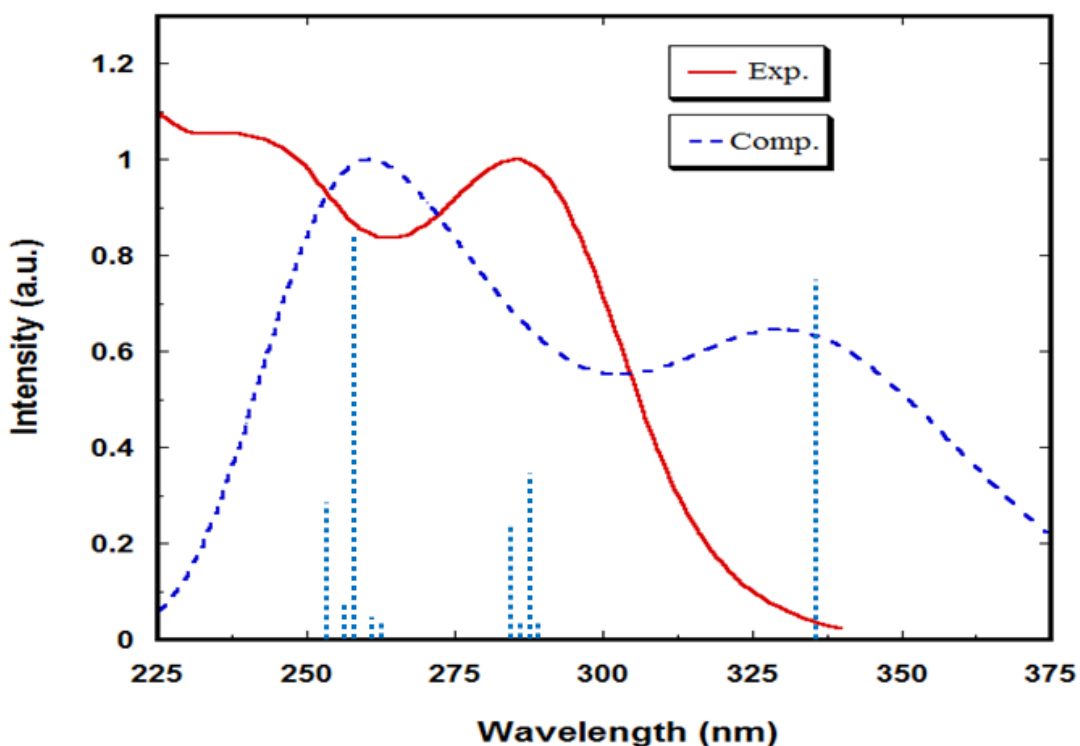

**Figure S1:** Experimental and simulated electronic absorption spectra of NIF in 1,4-dioxane obtained at the B3LYP/6-31G+(d) level of theory. The vertical lines in (A) represent the relative oscillator strength of each transition.

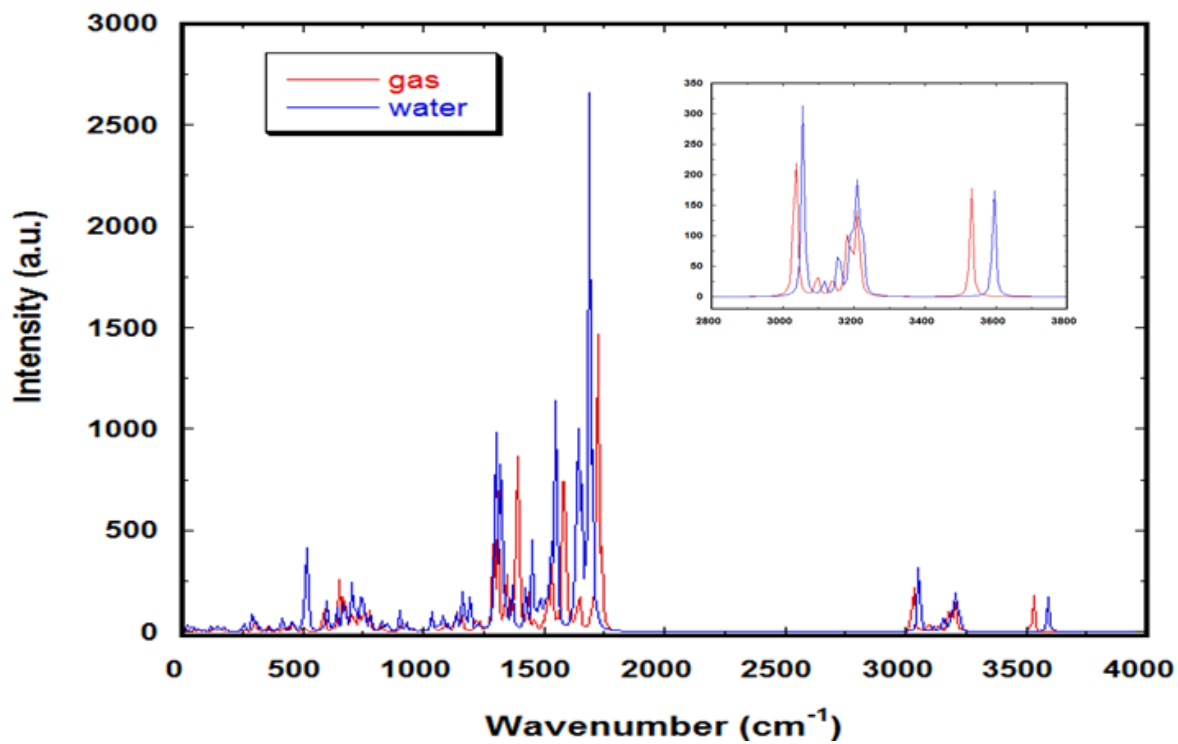

**Figure S1:** Simulated IR spectra of NIF in vacuo and in water obtained at the B3LYP/6-31G+(d) level of theory.

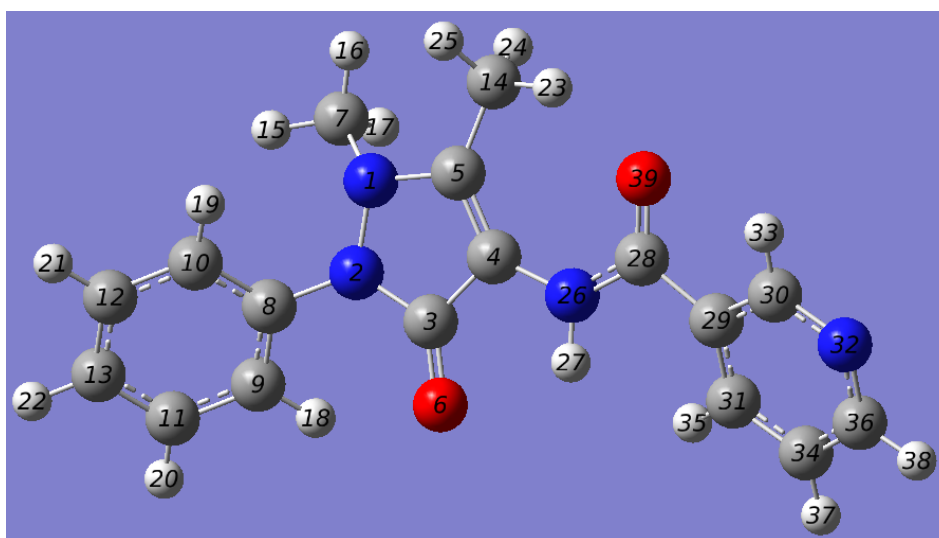

**Figure S3.** Numbering format for NIF generated by Gaussian G09. See Table S3 for simulated structural information

**Table S1.** Energy (eV) of selected frontier orbitals in different solvents obtained at the TD-DFT/CAM-B3LYP/6-31G+(d) theoretical level

| Solvent      | HOMO    | LUMO    | HOMO -1 | HOMO -2 | HOMO -3 | HOMO -4 | LUMO +1 | LUMO +2 | $\Delta E^*$ |
|--------------|---------|---------|---------|---------|---------|---------|---------|---------|--------------|
| Vacuu        | -0.2731 | -0.0210 | -0.2913 | -0.3195 | -0.3267 | -0.6321 | 0.0025  | 0.0070  | 0.2521       |
| Water        | -0.2808 | -0.0195 | -0.3010 | -0.3211 | -0.3311 | -0.3396 | 0.0018  | 0.0053  | 0.2613       |
| Methanol     | -0.2802 | -0.0194 | -0.3002 | -0.3208 | -0.3308 | -0.3394 | 0.0020  | 0.0054  | 0.2609       |
| Ethanol      | -0.2776 | -0.0200 | -0.2986 | -0.3208 | -0.3309 | -0.3394 | 0.0019  | 0.0056  | 0.2576       |
| 1-Propanol   | -0.2775 | -0.0200 | -0.2983 | -0.3207 | -0.3308 | -0.3393 | 0.0019  | 0.0057  | 0.2574       |
| 2-Propanol   | -0.2774 | -0.0200 | -0.2982 | -0.3207 | -0.3308 | -0.3392 | 0.0019  | 0.0057  | 0.2574       |
| Acetonitrile | -0.2779 | -0.0201 | -0.2990 | -0.3210 | -0.3310 | -0.3397 | 0.0018  | 0.0056  | 0.2578       |
| Ethylacetate | -0.2744 | -0.0202 | -0.2952 | -0.3197 | -0.3300 | -0.3375 | 0.0024  | 0.0063  | 0.2542       |
| Chloroform   | -0.2743 | -0.0202 | -0.2942 | -0.3194 | -0.3297 | -0.3371 | 0.0024  | 0.0060  | 0.2541       |
| 1,4-Dioxane  | -0.2730 | -0.0206 | -0.2923 | -0.3191 | -0.3284 | -0.3345 | 0.0028  | 0.0065  | 0.2524       |
| n-Hexane     | -0.2730 | -0.0206 | -0.2920 | -0.3191 | -0.3281 | -0.3340 | 0.0028  | 0.0066  | 0.2524       |

$$*\Delta E = (E_{\text{LUMO}} - E_{\text{HOMO}})$$

**Table S2.** Energy (eV) of selected frontier orbitals in different solvents obtained at the TD-DFT/B3LYP/6-31G+(d) theoretical level

| Solvent     | HOMO    | LUMO    | HOMO -1 | HOMO -2 | HOMO -3 | HOMO -4 | LUMO +1 | LUMO +2 | $\Delta E^*$ |
|-------------|---------|---------|---------|---------|---------|---------|---------|---------|--------------|
| Vacuu       | -0.2219 | -0.0660 | -0.2397 | -0.2651 | -0.2661 | -0.2752 | -0.0436 | -0.0391 | 0.1559       |
| water       | -0.2275 | -0.0651 | -0.2477 | -0.2672 | -0.2732 | -0.2786 | -0.0452 | -0.0398 | 0.1624       |
| Methanol    | -0.2271 | -0.0650 | -0.2469 | -0.2668 | -0.2728 | -0.2784 | -0.0450 | -0.0397 | 0.1621       |
| Isopropanol | -0.2246 | -0.0655 | -0.2452 | -0.2668 | -0.2726 | -0.2789 | -0.0450 | -0.0394 | 0.1591       |
| AcNT        | -0.2251 | -0.0656 | -0.2459 | -0.2672 | -0.2730 | -0.2792 | -0.0452 | -0.0394 | 0.1595       |
| 1,4-Dioxane | -0.2214 | -0.0657 | -0.2404 | -0.2656 | -0.2682 | -0.2768 | -0.0436 | -0.0392 | 0.1557       |

$$*\Delta E = (E_{\text{LUMO}} - E_{\text{HOMO}})$$

**Table S3.** Mulliken atomic charges of non-H atoms of NIF

| Atom | Vacuo   | water   | MeOH    | EthOH   | 2-PropOH | 1-PropOH | AcNT    | Ethy.Ac. | Chloroform | Dioxane | n-Hexane |
|------|---------|---------|---------|---------|----------|----------|---------|----------|------------|---------|----------|
| N3   | -0.1603 | -0.1435 | -0.0704 | -0.0943 | -0.1121  | -0.0786  | -0.0886 | -0.0934  | -0.1417    | -0.0664 | -0.0906  |
| N4   | 0.1684  | 0.1942  | 0.2977  | 0.3129  | 0.2114   | 0.2762   | 0.0145  | 0.3058   | 0.1844     | 0.2804  | 0.2951   |
| C9   | 0.3838  | 0.2922  | 0.8890  | 0.7891  | 0.4213   | 1.0924   | 0.4838  | 0.7842   | 0.2729     | 0.8787  | 0.7734   |
| C7   | 0.4299  | 0.8307  | -0.3772 | 0.0438  | 0.6152   | -1.3443  | -0.1458 | 0.0543   | 0.8535     | -0.3613 | 0.0736   |
| C8   | 0.4595  | 0.2058  | 0.5572  | 0.2757  | 0.3457   | 1.1897   | 0.3795  | 0.2689   | 0.1961     | 0.5449  | 0.2551   |
| O2   | -0.5600 | -0.6210 | -0.5978 | -0.6008 | -0.6331  | -0.6165  | -0.6122 | -0.5790  | -0.5969    | -0.5332 | -0.5340  |
| C11  | -0.4062 | -0.3921 | -0.4056 | -0.4194 | -0.3998  | -0.3704  | -0.2031 | -0.4151  | -0.3881    | -0.3932 | -0.4081  |
| C12  | -1.1135 | -1.3969 | -1.6444 | -1.6271 | -1.3487  | -1.5306  | -1.0752 | -1.6300  | -1.3995    | -1.6639 | -1.6460  |
| C17  | -0.5502 | -0.3628 | -0.0981 | -0.1635 | -0.2833  | -0.0979  | -0.1970 | -0.1605  | -0.3637    | -0.0889 | -0.1506  |
| C13  | 0.7907  | 1.0351  | 0.9652  | 1.0082  | 0.9323   | 0.9516   | 0.6580  | 1.0037   | 1.0314     | 0.9560  | 0.9960   |
| C16  | -0.2510 | -0.3744 | -0.3086 | -0.3089 | -0.3940  | -0.3408  | -0.3148 | -0.3040  | -0.3645    | -0.2928 | -0.2910  |
| C14  | -0.0552 | -0.2782 | -0.4101 | -0.3881 | -0.3054  | -0.4343  | -0.0097 | -0.3752  | -0.2586    | -0.3754 | -0.3524  |
| C15  | -0.1659 | -0.1116 | -0.0694 | -0.0804 | -0.1095  | -0.0723  | -0.0685 | -0.0729  | -0.1008    | -0.0491 | -0.0586  |
| C10  | -1.2841 | -1.2248 | -1.0065 | -0.9817 | -1.2331  | -1.1029  | -0.5473 | -0.9819  | -1.2229    | -1.0074 | -0.9821  |
| N2   | -0.6115 | -0.5973 | -0.5638 | -0.5668 | -0.5689  | -0.4792  | -0.3912 | -0.5728  | -0.6098    | -0.5746 | -0.5813  |
| C6   | 0.2556  | -0.1179 | -0.7956 | -0.7812 | -0.3177  | -0.7724  | 0.1623  | -0.7988  | -0.1418    | -0.8440 | -0.8315  |
| C2   | 0.5086  | 0.8099  | 1.3189  | 1.2605  | 0.9352   | 1.3594   | 0.4099  | 1.2759   | 0.8241     | 1.3656  | 1.3034   |
| C1   | -0.1899 | -0.2950 | -0.2537 | -0.2455 | -0.2366  | -0.2738  | -0.0957 | -0.2499  | -0.2960    | -0.2663 | -0.2555  |
| C3   | -0.1878 | -0.0896 | -0.1196 | -0.1348 | -0.1548  | 0.0512   | 0.1070  | -0.1488  | -0.1075    | -0.1595 | -0.1773  |
| N1   | -0.1678 | -0.2398 | -0.2320 | -0.2317 | -0.2402  | -0.2306  | -0.2606 | -0.2155  | -0.2153    | -0.1869 | -0.1822  |
| C4   | -0.0736 | -0.0243 | -0.0493 | -0.0169 | -0.0123  | -0.1656  | -0.1271 | -0.0112  | -0.0160    | -0.0325 | 0.0026   |
| C5   | -0.3245 | -0.3404 | -0.3345 | -0.3380 | -0.3445  | -0.3154  | -0.2513 | -0.3378  | -0.3401    | -0.3349 | -0.3384  |
| O1   | -0.5699 | -0.6149 | -0.5451 | -0.5533 | -0.6254  | -0.5267  | -0.6090 | -0.5365  | -0.5936    | -0.4974 | -0.5038  |

**Table S4.** Structural parameters of NIF in different solvents obtained at the DFT/B3LYP/6-31G+(d) theoretical level. Items' numbers correspond to atoms as displayed in Fig. S3.

| Item                          | Vacuo  | water  | MeOH   | EthOH  | 2-PropOH | 1-PropOH | AcNT   | Eth.Ac. | Chloroform | Dioxane | n-Hexane |
|-------------------------------|--------|--------|--------|--------|----------|----------|--------|---------|------------|---------|----------|
| <b><i>Bond Length (Å)</i></b> |        |        |        |        |          |          |        |         |            |         |          |
| R(1,2)                        | 1.4138 | 1.4106 | 1.4110 | 1.4111 | 1.4113   | 1.4112   | 1.4109 | 1.4121  | 1.4123     | 1.4128  | 1.4131   |
| R(1,5)                        | 1.4091 | 1.3764 | 1.3773 | 1.3800 | 1.3805   | 1.3804   | 1.3793 | 1.3880  | 1.3921     | 1.4016  | 1.4030   |
| R(1,7)                        | 1.4727 | 1.4676 | 1.4677 | 1.4679 | 1.4679   | 1.4680   | 1.4678 | 1.4688  | 1.4705     | 1.4722  | 1.4724   |
| R(2,3)                        | 1.3937 | 1.4048 | 1.4053 | 1.4037 | 1.4039   | 1.4037   | 1.4035 | 1.4017  | 1.3998     | 1.3951  | 1.3949   |
| R(2,8)                        | 1.4222 | 1.4275 | 1.4274 | 1.4272 | 1.4271   | 1.4272   | 1.4273 | 1.4261  | 1.4254     | 1.4237  | 1.4233   |
| R(3,4)                        | 1.4585 | 1.4463 | 1.4466 | 1.4464 | 1.4466   | 1.4466   | 1.4462 | 1.4487  | 1.4503     | 1.4542  | 1.4550   |
| R(3,6)                        | 1.2330 | 1.2407 | 1.2401 | 1.2405 | 1.2402   | 1.2403   | 1.2409 | 1.2383  | 1.2377     | 1.2360  | 1.2354   |
| R(4,5)                        | 1.3658 | 1.3717 | 1.3712 | 1.3707 | 1.3705   | 1.3705   | 1.3710 | 1.3685  | 1.3679     | 1.3672  | 1.3668   |
| R(4,26)                       | 1.3994 | 1.4097 | 1.4094 | 1.4077 | 1.4075   | 1.4076   | 1.4078 | 1.4056  | 1.4047     | 1.4019  | 1.4014   |
| R(5,14)                       | 1.4954 | 1.4923 | 1.4923 | 1.4924 | 1.4925   | 1.4924   | 1.4924 | 1.4932  | 1.4938     | 1.4948  | 1.4949   |
| R(7,15)                       | 1.0912 | 1.0903 | 1.0903 | 1.0904 | 1.0904   | 1.0904   | 1.0903 | 1.0905  | 1.0906     | 1.0909  | 1.0910   |
| R(7,16)                       | 1.0908 | 1.0904 | 1.0904 | 1.0904 | 1.0904   | 1.0904   | 1.0904 | 1.0906  | 1.0905     | 1.0905  | 1.0905   |
| R(7,17)                       | 1.0993 | 1.0970 | 1.0971 | 1.0973 | 1.0973   | 1.0973   | 1.0972 | 1.0979  | 1.0980     | 1.0985  | 1.0987   |
| R(8,9)                        | 1.4012 | 1.3993 | 1.3993 | 1.3993 | 1.3993   | 1.3993   | 1.3993 | 1.3997  | 1.4001     | 1.4007  | 1.4008   |
| R(8,10)                       | 1.4015 | 1.4011 | 1.4011 | 1.4010 | 1.4010   | 1.4010   | 1.4010 | 1.4010  | 1.4012     | 1.4013  | 1.4013   |
| R(9,11)                       | 1.3955 | 1.3971 | 1.3971 | 1.3971 | 1.3971   | 1.3971   | 1.3971 | 1.3967  | 1.3966     | 1.3961  | 1.3960   |
| R(9,18)                       | 1.0836 | 1.0849 | 1.0848 | 1.0848 | 1.0848   | 1.0848   | 1.0849 | 1.0845  | 1.0843     | 1.0839  | 1.0838   |
| R(10,12)                      | 1.3964 | 1.3970 | 1.3970 | 1.3970 | 1.3970   | 1.3970   | 1.3970 | 1.3969  | 1.3967     | 1.3966  | 1.3965   |
| R(10,19)                      | 1.0853 | 1.0858 | 1.0858 | 1.0857 | 1.0857   | 1.0857   | 1.0858 | 1.0856  | 1.0855     | 1.0854  | 1.0854   |
| R(11,13)                      | 1.3982 | 1.3989 | 1.3988 | 1.3988 | 1.3988   | 1.3988   | 1.3989 | 1.3986  | 1.3986     | 1.3984  | 1.3984   |
| R(11,20)                      | 1.0868 | 1.0866 | 1.0866 | 1.0866 | 1.0866   | 1.0866   | 1.0866 | 1.0866  | 1.0867     | 1.0867  | 1.0867   |
| R(12,13)                      | 1.3974 | 1.3990 | 1.3990 | 1.3990 | 1.3989   | 1.3989   | 1.3990 | 1.3986  | 1.3984     | 1.3980  | 1.3979   |
| R(12,21)                      | 1.0870 | 1.0866 | 1.0866 | 1.0866 | 1.0866   | 1.0866   | 1.0866 | 1.0867  | 1.0867     | 1.0868  | 1.0869   |
| R(13,22)                      | 1.0866 | 1.0865 | 1.0865 | 1.0865 | 1.0865   | 1.0865   | 1.0865 | 1.0866  | 1.0866     | 1.0866  | 1.0866   |
| R(14,23)                      | 1.0899 | 1.0916 | 1.0915 | 1.0907 | 1.0907   | 1.0907   | 1.0908 | 1.0895  | 1.0894     | 1.0899  | 1.0899   |
| R(14,24)                      | 1.0989 | 1.0965 | 1.0965 | 1.0964 | 1.0964   | 1.0964   | 1.0964 | 1.0973  | 1.0978     | 1.0985  | 1.0986   |
| R(14,25)                      | 1.0960 | 1.0955 | 1.0956 | 1.0958 | 1.0959   | 1.0958   | 1.0958 | 1.0958  | 1.0955     | 1.0955  | 1.0955   |
| R(26,27)                      | 1.0175 | 1.0133 | 1.0133 | 1.0133 | 1.0133   | 1.0133   | 1.0132 | 1.0142  | 1.0147     | 1.0164  | 1.0166   |
| R(26,28)                      | 1.3726 | 1.3708 | 1.3715 | 1.3720 | 1.3724   | 1.3723   | 1.3716 | 1.3743  | 1.3736     | 1.3726  | 1.3727   |
| R(28,29)                      | 1.5009 | 1.5000 | 1.4999 | 1.4996 | 1.4996   | 1.4996   | 1.4996 | 1.4992  | 1.4992     | 1.4998  | 1.4999   |
| R(28,39)                      | 1.2303 | 1.2347 | 1.2342 | 1.2343 | 1.2341   | 1.2341   | 1.2345 | 1.2328  | 1.2329     | 1.2321  | 1.2318   |
| R(29,30)                      | 1.4052 | 1.4037 | 1.4037 | 1.4039 | 1.4039   | 1.4039   | 1.4039 | 1.4042  | 1.4042     | 1.4047  | 1.4048   |
| R(29,31)                      | 1.4009 | 1.4010 | 1.4009 | 1.4011 | 1.4011   | 1.4011   | 1.4012 | 1.4010  | 1.4010     | 1.4009  | 1.4009   |
| R(30,32)                      | 1.3365 | 1.3380 | 1.3380 | 1.3380 | 1.3379   | 1.3380   | 1.3380 | 1.3376  | 1.3375     | 1.3371  | 1.3370   |
| R(30,33)                      | 1.0865 | 1.0867 | 1.0867 | 1.0867 | 1.0867   | 1.0867   | 1.0867 | 1.0866  | 1.0866     | 1.0865  | 1.0865   |
| R(31,34)                      | 1.3941 | 1.3944 | 1.3944 | 1.3944 | 1.3944   | 1.3944   | 1.3944 | 1.3943  | 1.3943     | 1.3941  | 1.3941   |
| R(31,35)                      | 1.0871 | 1.0864 | 1.0864 | 1.0865 | 1.0865   | 1.0865   | 1.0865 | 1.0866  | 1.0867     | 1.0868  | 1.0869   |
| R(32,36)                      | 1.3408 | 1.3440 | 1.3439 | 1.3438 | 1.3438   | 1.3438   | 1.3439 | 1.3432  | 1.3431     | 1.3422  | 1.3420   |
| R(34,36)                      | 1.3967 | 1.3960 | 1.3960 | 1.3960 | 1.3960   | 1.3960   | 1.3960 | 1.3962  | 1.3963     | 1.3964  | 1.3965   |

|                       |        |        |        |        |        |        |        |        |        |        |        |
|-----------------------|--------|--------|--------|--------|--------|--------|--------|--------|--------|--------|--------|
| R(34,37)              | 1.0861 | 1.0854 | 1.0855 | 1.0855 | 1.0855 | 1.0855 | 1.0854 | 1.0856 | 1.0857 | 1.0859 | 1.0859 |
| R(36,38)              | 1.0884 | 1.0876 | 1.0877 | 1.0877 | 1.0877 | 1.0877 | 1.0877 | 1.0878 | 1.0878 | 1.0880 | 1.0881 |
| <b>Bond Angle (°)</b> |        |        |        |        |        |        |        |        |        |        |        |
| A(2,1,5)              | 106.98 | 107.23 | 107.21 | 107.17 | 107.16 | 107.16 | 107.18 | 107.07 | 107.05 | 107.01 | 107.00 |
| A(2,1,7)              | 112.69 | 116.24 | 116.10 | 115.96 | 115.89 | 115.90 | 116.04 | 115.11 | 114.49 | 113.44 | 113.28 |
| A(5,1,7)              | 117.52 | 121.77 | 121.62 | 121.40 | 121.32 | 121.32 | 121.50 | 120.29 | 119.56 | 118.44 | 118.24 |
| A(1,2,3)              | 109.60 | 109.33 | 109.32 | 109.33 | 109.33 | 109.33 | 109.33 | 109.38 | 109.45 | 109.56 | 109.57 |
| A(1,2,8)              | 119.73 | 119.46 | 119.39 | 119.43 | 119.39 | 119.40 | 119.46 | 119.45 | 119.41 | 119.67 | 119.68 |
| A(3,2,8)              | 124.95 | 123.79 | 123.72 | 123.85 | 123.83 | 123.85 | 123.87 | 124.03 | 124.32 | 124.79 | 124.82 |
| A(2,3,4)              | 105.38 | 104.56 | 104.56 | 104.65 | 104.65 | 104.65 | 104.64 | 104.82 | 104.93 | 105.22 | 105.24 |
| A(2,3,6)              | 127.17 | 124.93 | 124.98 | 125.22 | 125.25 | 125.24 | 125.18 | 125.78 | 126.05 | 126.73 | 126.82 |
| A(4,3,6)              | 127.42 | 130.49 | 130.44 | 130.12 | 130.09 | 130.09 | 130.16 | 129.39 | 129.00 | 128.04 | 127.92 |
| A(3,4,5)              | 108.80 | 108.82 | 108.84 | 108.87 | 108.88 | 108.88 | 108.86 | 108.92 | 108.90 | 108.84 | 108.84 |
| A(3,4,26)             | 114.76 | 123.37 | 123.24 | 122.45 | 122.36 | 122.38 | 122.55 | 120.44 | 119.36 | 116.53 | 116.23 |
| A(5,4,26)             | 136.43 | 127.73 | 127.83 | 128.62 | 128.70 | 128.68 | 128.53 | 130.62 | 131.73 | 134.62 | 134.93 |
| A(1,5,4)              | 108.91 | 109.37 | 109.38 | 109.27 | 109.28 | 109.27 | 109.27 | 109.15 | 109.10 | 108.94 | 108.94 |
| A(1,5,14)             | 118.54 | 121.62 | 121.58 | 121.35 | 121.31 | 121.31 | 121.39 | 120.54 | 120.09 | 119.21 | 119.10 |
| A(4,5,14)             | 132.51 | 129.00 | 129.03 | 129.36 | 129.39 | 129.40 | 129.33 | 130.26 | 130.75 | 131.79 | 131.90 |
| A(1,7,15)             | 108.96 | 109.15 | 109.13 | 109.09 | 109.09 | 109.09 | 109.10 | 109.06 | 109.04 | 108.99 | 108.99 |
| A(1,7,16)             | 108.52 | 108.19 | 108.21 | 108.20 | 108.21 | 108.20 | 108.19 | 108.24 | 108.36 | 108.49 | 108.50 |
| A(1,7,17)             | 111.55 | 111.30 | 111.32 | 111.42 | 111.44 | 111.43 | 111.41 | 111.53 | 111.46 | 111.46 | 111.47 |
| A(15,7,16)            | 108.55 | 108.46 | 108.45 | 108.41 | 108.41 | 108.41 | 108.41 | 108.42 | 108.45 | 108.50 | 108.51 |
| A(15,7,17)            | 109.37 | 109.67 | 109.65 | 109.65 | 109.63 | 109.64 | 109.66 | 109.55 | 109.54 | 109.48 | 109.45 |
| A(16,7,17)            | 109.83 | 110.01 | 110.01 | 110.00 | 110.00 | 110.00 | 110.00 | 109.98 | 109.93 | 109.87 | 109.86 |
| A(2,8,9)              | 118.96 | 118.63 | 118.63 | 118.67 | 118.67 | 118.67 | 118.66 | 118.71 | 118.82 | 118.89 | 118.91 |
| A(2,8,10)             | 120.71 | 120.85 | 120.86 | 120.82 | 120.83 | 120.82 | 120.82 | 120.83 | 120.74 | 120.70 | 120.70 |
| A(9,8,10)             | 120.33 | 120.51 | 120.50 | 120.50 | 120.50 | 120.50 | 120.51 | 120.46 | 120.44 | 120.40 | 120.39 |
| A(8,9,11)             | 119.42 | 119.55 | 119.54 | 119.53 | 119.52 | 119.52 | 119.53 | 119.51 | 119.49 | 119.45 | 119.44 |
| A(8,9,18)             | 119.67 | 119.62 | 119.63 | 119.64 | 119.64 | 119.64 | 119.64 | 119.64 | 119.67 | 119.70 | 119.70 |
| A(11,9,18)            | 120.91 | 120.83 | 120.83 | 120.84 | 120.83 | 120.83 | 120.84 | 120.85 | 120.84 | 120.85 | 120.86 |
| A(8,10,12)            | 119.58 | 119.48 | 119.49 | 119.50 | 119.50 | 119.50 | 119.49 | 119.51 | 119.53 | 119.54 | 119.55 |
| A(8,10,19)            | 119.66 | 119.86 | 119.85 | 119.82 | 119.82 | 119.82 | 119.83 | 119.78 | 119.76 | 119.72 | 119.71 |
| A(12,10,19)           | 120.75 | 120.66 | 120.66 | 120.68 | 120.68 | 120.68 | 120.68 | 120.71 | 120.71 | 120.74 | 120.74 |
| A(9,11,13)            | 120.67 | 120.33 | 120.34 | 120.36 | 120.37 | 120.37 | 120.35 | 120.43 | 120.47 | 120.56 | 120.58 |
| A(9,11,20)            | 119.22 | 119.49 | 119.47 | 119.46 | 119.46 | 119.46 | 119.47 | 119.41 | 119.37 | 119.30 | 119.28 |
| A(13,11,20)           | 120.11 | 120.18 | 120.18 | 120.17 | 120.17 | 120.17 | 120.18 | 120.16 | 120.15 | 120.14 | 120.13 |
| A(10,12,13)           | 120.47 | 120.36 | 120.36 | 120.35 | 120.35 | 120.35 | 120.35 | 120.38 | 120.40 | 120.44 | 120.44 |
| A(10,12,21)           | 119.34 | 119.46 | 119.45 | 119.45 | 119.45 | 119.45 | 119.46 | 119.42 | 119.40 | 119.37 | 119.37 |
| A(13,12,21)           | 120.18 | 120.18 | 120.19 | 120.19 | 120.20 | 120.20 | 120.19 | 120.19 | 120.19 | 120.19 | 120.19 |
| A(11,13,12)           | 119.52 | 119.77 | 119.76 | 119.75 | 119.74 | 119.74 | 119.76 | 119.69 | 119.66 | 119.60 | 119.58 |
| A(11,13,22)           | 120.25 | 120.13 | 120.13 | 120.13 | 120.13 | 120.13 | 120.13 | 120.16 | 120.17 | 120.20 | 120.21 |
| A(12,13,22)           | 120.23 | 120.10 | 120.11 | 120.12 | 120.12 | 120.12 | 120.12 | 120.15 | 120.17 | 120.20 | 120.21 |
| A(5,14,23)            | 109.49 | 109.64 | 109.65 | 109.79 | 109.80 | 109.80 | 109.78 | 110.01 | 109.91 | 109.60 | 109.57 |
| A(5,14,24)            | 111.15 | 111.24 | 111.24 | 111.20 | 111.20 | 111.19 | 111.20 | 110.94 | 110.93 | 110.99 | 111.02 |

|             |        |        |        |        |        |        |        |        |        |        |        |
|-------------|--------|--------|--------|--------|--------|--------|--------|--------|--------|--------|--------|
| A(5,14,25)  | 110.79 | 111.32 | 111.32 | 111.27 | 111.27 | 111.27 | 111.27 | 111.24 | 111.16 | 110.99 | 110.96 |
| A(23,14,24) | 108.56 | 108.11 | 108.13 | 108.25 | 108.26 | 108.26 | 108.23 | 108.57 | 108.77 | 108.77 | 108.75 |
| A(23,14,25) | 108.89 | 108.49 | 108.46 | 108.26 | 108.24 | 108.25 | 108.29 | 108.02 | 108.04 | 108.47 | 108.53 |
| A(24,14,25) | 107.91 | 107.93 | 107.94 | 107.97 | 107.97 | 107.97 | 107.96 | 107.96 | 107.94 | 107.94 | 107.94 |
| A(4,26,27)  | 110.58 | 116.72 | 116.58 | 115.78 | 115.69 | 115.71 | 115.88 | 113.99 | 113.31 | 111.51 | 111.33 |
| A(4,26,28)  | 129.29 | 123.78 | 123.77 | 124.35 | 124.34 | 124.34 | 124.35 | 125.12 | 126.00 | 127.99 | 128.18 |
| A(27,26,28) | 117.86 | 117.88 | 117.79 | 117.65 | 117.61 | 117.62 | 117.70 | 117.16 | 117.07 | 117.26 | 117.34 |
| A(26,28,29) | 115.25 | 115.78 | 115.72 | 115.69 | 115.67 | 115.68 | 115.70 | 115.46 | 115.34 | 115.27 | 115.25 |
| A(26,28,39) | 123.34 | 122.82 | 122.83 | 122.83 | 122.83 | 122.83 | 122.83 | 122.87 | 122.98 | 123.19 | 123.22 |
| A(29,28,39) | 121.41 | 121.40 | 121.45 | 121.48 | 121.49 | 121.49 | 121.46 | 121.66 | 121.67 | 121.54 | 121.53 |
| A(28,29,30) | 117.76 | 118.14 | 118.13 | 118.09 | 118.09 | 118.08 | 118.09 | 118.07 | 118.13 | 117.96 | 117.93 |
| A(28,29,31) | 124.55 | 124.01 | 124.02 | 124.09 | 124.09 | 124.10 | 124.09 | 124.13 | 124.05 | 124.29 | 124.32 |
| A(30,29,31) | 117.68 | 117.83 | 117.84 | 117.81 | 117.81 | 117.81 | 117.81 | 117.80 | 117.80 | 117.74 | 117.73 |
| A(29,30,32) | 123.92 | 123.82 | 123.82 | 123.84 | 123.84 | 123.84 | 123.84 | 123.83 | 123.82 | 123.87 | 123.87 |
| A(29,30,33) | 119.18 | 119.48 | 119.47 | 119.43 | 119.43 | 119.43 | 119.44 | 119.40 | 119.41 | 119.31 | 119.29 |
| A(32,30,33) | 116.90 | 116.69 | 116.70 | 116.73 | 116.73 | 116.73 | 116.72 | 116.77 | 116.77 | 116.82 | 116.83 |
| A(29,31,34) | 118.91 | 118.85 | 118.85 | 118.85 | 118.85 | 118.85 | 118.85 | 118.87 | 118.87 | 118.90 | 118.90 |
| A(29,31,35) | 121.26 | 121.25 | 121.23 | 121.30 | 121.28 | 121.29 | 121.31 | 121.20 | 121.16 | 121.21 | 121.21 |
| A(34,31,35) | 119.81 | 119.88 | 119.90 | 119.83 | 119.84 | 119.83 | 119.82 | 119.90 | 119.95 | 119.87 | 119.87 |
| A(30,32,36) | 117.45 | 117.47 | 117.47 | 117.47 | 117.48 | 117.48 | 117.47 | 117.48 | 117.48 | 117.47 | 117.47 |
| A(31,34,36) | 118.55 | 118.65 | 118.64 | 118.65 | 118.65 | 118.65 | 118.66 | 118.62 | 118.61 | 118.58 | 118.58 |
| A(31,34,37) | 121.00 | 121.00 | 121.00 | 120.99 | 120.99 | 120.99 | 120.98 | 121.01 | 121.02 | 121.00 | 121.01 |
| A(36,34,37) | 120.45 | 120.35 | 120.35 | 120.36 | 120.36 | 120.36 | 120.36 | 120.37 | 120.37 | 120.41 | 120.42 |
| A(32,36,34) | 123.50 | 123.37 | 123.38 | 123.37 | 123.37 | 123.37 | 123.37 | 123.40 | 123.41 | 123.44 | 123.45 |
| A(32,36,38) | 116.00 | 116.19 | 116.18 | 116.18 | 116.17 | 116.18 | 116.18 | 116.14 | 116.12 | 116.07 | 116.06 |
| A(34,36,38) | 120.51 | 120.44 | 120.44 | 120.45 | 120.45 | 120.45 | 120.45 | 120.46 | 120.47 | 120.49 | 120.49 |

***Dihedral angle (°)***

|             |         |         |         |         |         |         |         |         |         |         |         |
|-------------|---------|---------|---------|---------|---------|---------|---------|---------|---------|---------|---------|
| D(5,1,2,3)  | 5.74    | 8.66    | 8.66    | 8.81    | 8.78    | 8.78    | 8.85    | 8.37    | 7.70    | 6.61    | 6.44    |
| D(5,1,2,8)  | 160.36  | 159.71  | 159.43  | 159.94  | 159.80  | 159.86  | 160.08  | 160.01  | 160.01  | 160.67  | 160.63  |
| D(7,1,2,3)  | 136.38  | 148.78  | 148.38  | 148.01  | 147.76  | 147.78  | 148.29  | 144.97  | 142.66  | 139.10  | 138.53  |
| D(7,1,2,8)  | -68.99  | -60.16  | -60.85  | -60.86  | -61.22  | -61.14  | -60.48  | -63.39  | -65.03  | -66.84  | -67.28  |
| D(2,1,5,4)  | -5.44   | -6.91   | -6.96   | -7.38   | -7.38   | -7.37   | -7.36   | -7.48   | -6.97   | -6.24   | -6.10   |
| D(2,1,5,14) | 172.51  | 171.99  | 171.91  | 171.25  | 171.21  | 171.22  | 171.29  | 170.25  | 170.64  | 171.30  | 171.50  |
| D(7,1,5,4)  | -133.32 | -144.34 | -143.97 | -143.88 | -143.66 | -143.67 | -144.12 | -141.38 | -139.22 | -135.94 | -135.40 |
| D(7,1,5,14) | 44.64   | 34.56   | 34.90   | 34.75   | 34.94   | 34.92   | 34.54   | 36.35   | 38.40   | 41.60   | 42.20   |
| D(2,1,7,15) | 57.34   | 54.60   | 54.64   | 54.45   | 54.43   | 54.45   | 54.46   | 55.18   | 55.95   | 57.12   | 57.25   |
| D(2,1,7,16) | 175.37  | 172.43  | 172.46  | 172.20  | 172.18  | 172.20  | 172.22  | 172.94  | 173.81  | 175.08  | 175.23  |
| D(2,1,7,17) | -63.51  | -66.60  | -66.53  | -66.75  | -66.76  | -66.74  | -66.75  | -65.94  | -65.10  | -63.83  | -63.67  |
| D(5,1,7,15) | -177.57 | -171.48 | -171.85 | -172.56 | -172.80 | -172.76 | -172.30 | -174.34 | -175.10 | -176.20 | -176.42 |
| D(5,1,7,16) | -59.55  | -53.65  | -54.03  | -54.81  | -55.05  | -55.01  | -54.55  | -56.58  | -57.24  | -58.23  | -58.44  |
| D(5,1,7,17) | 61.58   | 67.32   | 66.98   | 66.24   | 66.02   | 66.05   | 66.49   | 64.54   | 63.85   | 62.86   | 62.66   |
| D(1,2,3,4)  | -3.78   | -6.84   | -6.80   | -6.65   | -6.60   | -6.60   | -6.71   | -5.90   | -5.34   | -4.37   | -4.23   |
| D(1,2,3,6)  | 174.50  | 171.73  | 171.82  | 172.08  | 172.15  | 172.13  | 171.99  | 172.97  | 173.44  | 174.18  | 174.28  |
| D(8,2,3,4)  | -156.78 | -156.38 | -156.04 | -156.22 | -156.05 | -156.13 | -156.40 | -155.95 | -156.00 | -156.80 | -156.80 |

|                |         |         |         |         |         |         |         |         |         |         |         |
|----------------|---------|---------|---------|---------|---------|---------|---------|---------|---------|---------|---------|
| D(8,2,3,6)     | 21.50   | 22.19   | 22.58   | 22.50   | 22.69   | 22.61   | 22.30   | 22.92   | 22.79   | 21.75   | 21.72   |
| D(1,2,8,9)     | 156.53  | 144.50  | 145.37  | 145.31  | 145.76  | 145.65  | 144.81  | 148.47  | 150.37  | 153.14  | 153.84  |
| D(1,2,8,10)    | -23.76  | -36.48  | -35.61  | -35.51  | -35.05  | -35.16  | -36.03  | -32.18  | -30.10  | -27.20  | -26.50  |
| D(3,2,8,9)     | -52.97  | -68.83  | -68.28  | -67.96  | -67.63  | -67.67  | -68.35  | -64.27  | -61.66  | -56.98  | -56.13  |
| D(3,2,8,10)    | 126.74  | 110.20  | 110.75  | 111.21  | 111.55  | 111.51  | 110.80  | 115.09  | 117.87  | 122.68  | 123.53  |
| D(2,3,4,5)     | 0.37    | 2.61    | 2.54    | 2.12    | 2.06    | 2.08    | 2.19    | 1.28    | 1.03    | 0.48    | 0.43    |
| D(2,3,4,26)    | 179.62  | 179.60  | 179.44  | 179.61  | 179.52  | 179.54  | 179.70  | 179.72  | -179.72 | -179.71 | -179.81 |
| D(6,3,4,5)     | -177.90 | -175.85 | -175.97 | -176.52 | -176.60 | -176.57 | -176.42 | -177.53 | -177.71 | -178.04 | -178.06 |
| D(6,3,4,26)    | 1.35    | 1.14    | 0.93    | 0.97    | 0.86    | 0.89    | 1.10    | 0.91    | 1.54    | 1.77    | 1.69    |
| D(3,4,5,1)     | 3.17    | 2.68    | 2.76    | 3.29    | 3.33    | 3.31    | 3.23    | 3.88    | 3.73    | 3.60    | 3.55    |
| D(3,4,5,14)    | -174.40 | -176.11 | -176.00 | -175.19 | -175.12 | -175.14 | -175.28 | -173.55 | -173.55 | -173.52 | -173.64 |
| D(26,4,5,1)    | -175.84 | -174.14 | -173.97 | -174.00 | -173.92 | -173.95 | -174.09 | -174.34 | -175.40 | -176.16 | -176.15 |
| D(26,4,5,14)   | 6.59    | 7.07    | 7.28    | 7.52    | 7.63    | 7.61    | 7.40    | 8.22    | 7.32    | 6.72    | 6.67    |
| D(3,4,26,27)   | 6.00    | 57.13   | 55.00   | 44.14   | 43.18   | 43.42   | 45.31   | 29.10   | 24.39   | 12.53   | 11.33   |
| D(3,4,26,28)   | -156.21 | -108.01 | -109.08 | -118.47 | -118.91 | -118.78 | -117.89 | -128.41 | -133.36 | -146.32 | -147.77 |
| D(5,4,26,27)   | -175.04 | -126.48 | -128.71 | -138.90 | -139.91 | -139.65 | -137.70 | -152.85 | -156.56 | -167.72 | -168.99 |
| D(5,4,26,28)   | 22.75   | 68.38   | 67.21   | 58.49   | 58.01   | 58.14   | 59.10   | 49.64   | 45.69   | 33.43   | 31.91   |
| D(1,5,14,23)   | 160.92  | 175.73  | 175.98  | 178.34  | 178.34  | 178.17  | 178.30  | 173.19  | 165.93  | 160.32  | 160.09  |
| D(1,5,14,24)   | -79.16  | -64.74  | -64.46  | -61.89  | -61.87  | -62.05  | -61.95  | -66.66  | -73.74  | -79.52  | -79.78  |
| D(1,5,14,25)   | 40.80   | 55.68   | 55.97   | 58.51   | 58.54   | 58.35   | 58.44   | 53.54   | 46.37   | 40.52   | 40.26   |
| D(4,5,14,23)   | -21.70  | -5.60   | -5.39   | -3.34   | -3.37   | -3.55   | -3.34   | -9.62   | -17.04  | -22.80  | -22.96  |
| D(4,5,14,24)   | 98.22   | 113.93  | 114.17  | 116.43  | 116.42  | 116.23  | 116.41  | 110.53  | 103.28  | 97.36   | 97.17   |
| D(4,5,14,25)   | -141.82 | -125.66 | -125.41 | -123.17 | -123.18 | -123.37 | -123.20 | -129.28 | -136.61 | -142.60 | -142.79 |
| D(2,8,9,11)    | 179.46  | 178.41  | 178.42  | 178.59  | 178.62  | 178.62  | 178.56  | 178.88  | 179.05  | 179.22  | 179.26  |
| D(2,8,9,18)    | 0.42    | -1.60   | -1.56   | -1.39   | -1.34   | -1.35   | -1.44   | -0.90   | -0.62   | -0.17   | -0.07   |
| D(10,8,9,11)   | -0.25   | -0.62   | -0.62   | -0.58   | -0.57   | -0.57   | -0.60   | -0.48   | -0.49   | -0.43   | -0.40   |
| D(10,8,9,18)   | -179.29 | 179.37  | 179.41  | 179.44  | 179.47  | 179.46  | 179.40  | 179.74  | 179.84  | -179.83 | -179.73 |
| D(2,8,10,12)   | 179.61  | -179.49 | -179.49 | -179.67 | -179.69 | -179.69 | -179.63 | -179.92 | 179.92  | 179.78  | 179.75  |
| D(2,8,10,19)   | -1.32   | 0.46    | 0.39    | 0.21    | 0.16    | 0.17    | 0.28    | -0.24   | -0.50   | -0.89   | -0.98   |
| D(9,8,10,12)   | -0.68   | -0.48   | -0.49   | -0.51   | -0.52   | -0.52   | -0.49   | -0.57   | -0.55   | -0.57   | -0.59   |
| D(9,8,10,19)   | 178.38  | 179.46  | 179.40  | 179.37  | 179.33  | 179.34  | 179.42  | 179.11  | 179.03  | 178.76  | 178.68  |
| D(8,9,11,13)   | 0.95    | 1.13    | 1.13    | 1.12    | 1.11    | 1.11    | 1.12    | 1.07    | 1.08    | 1.04    | 1.02    |
| D(8,9,11,20)   | -179.52 | -179.67 | -179.64 | -179.67 | -179.66 | -179.67 | -179.68 | -179.59 | -179.56 | -179.53 | -179.52 |
| D(18,9,11,13)  | 179.97  | -178.86 | -178.89 | -178.90 | -178.92 | -178.92 | -178.87 | -179.15 | -179.26 | -179.57 | -179.66 |
| D(18,9,11,20)  | -0.49   | 0.35    | 0.33    | 0.31    | 0.30    | 0.30    | 0.32    | 0.19    | 0.11    | -0.14   | -0.20   |
| D(8,10,12,13)  | 0.93    | 1.08    | 1.08    | 1.07    | 1.07    | 1.07    | 1.07    | 1.05    | 1.01    | 0.98    | 0.97    |
| D(8,10,12,21)  | -179.94 | -179.60 | -179.63 | -179.64 | -179.65 | -179.64 | -179.62 | -179.75 | -179.80 | -179.89 | -179.90 |
| D(19,10,12,13) | -178.12 | -178.86 | -178.80 | -178.81 | -178.77 | -178.78 | -178.84 | -178.63 | -178.57 | -178.34 | -178.29 |
| D(19,10,12,21) | 1.01    | 0.46    | 0.49    | 0.49    | 0.51    | 0.50    | 0.47    | 0.57    | 0.62    | 0.79    | 0.84    |
| D(9,11,13,12)  | -0.70   | -0.54   | -0.54   | -0.56   | -0.57   | -0.57   | -0.55   | -0.60   | -0.63   | -0.63   | -0.65   |
| D(9,11,13,22)  | 179.47  | 179.33  | 179.34  | 179.33  | 179.34  | 179.34  | 179.32  | 179.41  | 179.42  | 179.47  | 179.47  |
| D(20,11,13,12) | 179.77  | -179.74 | -179.76 | -179.77 | -179.79 | -179.78 | -179.74 | -179.94 | -179.98 | 179.94  | 179.90  |
| D(20,11,13,22) | -0.06   | 0.13    | 0.12    | 0.13    | 0.12    | 0.12    | 0.13    | 0.07    | 0.06    | 0.04    | 0.02    |
| D(10,12,13,11) | -0.25   | -0.58   | -0.57   | -0.54   | -0.53   | -0.53   | -0.55   | -0.46   | -0.43   | -0.38   | -0.36   |



|                |         |         |         |         |         |         |         |         |         |         |         |
|----------------|---------|---------|---------|---------|---------|---------|---------|---------|---------|---------|---------|
| D(10,12,13,22) | 179.58  | 179.56  | 179.54  | 179.57  | 179.56  | 179.56  | 179.57  | 179.52  | 179.52  | 179.52  | 179.52  |
| D(21,12,13,11) | -179.37 | -179.89 | -179.86 | -179.83 | -179.81 | -179.81 | -179.86 | -179.66 | -179.61 | -179.51 | -179.48 |
| D(21,12,13,22) | 0.46    | 0.24    | 0.26    | 0.28    | 0.28    | 0.28    | 0.27    | 0.33    | 0.34    | 0.39    | 0.40    |
| D(4,26,28,29)  | 177.13  | 177.24  | 176.73  | 176.63  | 176.39  | 176.44  | 176.89  | 174.28  | 175.13  | 175.85  | 175.99  |
| D(4,26,28,39)  | -2.89   | -3.51   | -4.07   | -4.28   | -4.56   | -4.50   | -3.97   | -6.65   | -5.79   | -4.56   | -4.37   |
| D(27,26,28,29) | 16.01   | 12.26   | 12.83   | 14.32   | 14.62   | 14.54   | 13.97   | 17.41   | 18.11   | 18.04   | 17.95   |
| D(27,26,28,39) | -164.01 | -168.49 | -167.97 | -166.59 | -166.33 | -166.39 | -166.90 | -163.52 | -162.81 | -162.38 | -162.40 |
| D(26,28,29,30) | -157.57 | -152.11 | -152.00 | -152.85 | -152.94 | -152.97 | -152.72 | -153.79 | -153.30 | -155.48 | -155.64 |
| D(26,28,29,31) | 23.76   | 29.15   | 29.22   | 28.50   | 28.43   | 28.38   | 28.60   | 27.39   | 28.08   | 25.82   | 25.68   |
| D(39,28,29,30) | 22.45   | 28.63   | 28.78   | 28.05   | 28.00   | 27.95   | 28.13   | 27.12   | 27.61   | 24.93   | 24.72   |
| D(39,28,29,31) | -156.21 | -150.11 | -150.00 | -150.60 | -150.64 | -150.69 | -150.55 | -151.70 | -151.01 | -153.77 | -153.97 |
| D(28,29,30,32) | -179.68 | -179.57 | -179.64 | -179.52 | -179.50 | -179.51 | -179.55 | -179.80 | -179.61 | -179.65 | -179.65 |
| D(28,29,30,33) | 0.39    | 0.86    | 0.82    | 0.86    | 0.86    | 0.86    | 0.84    | 0.56    | 0.74    | 0.59    | 0.57    |
| D(31,29,30,32) | -0.92   | -0.76   | -0.78   | -0.78   | -0.78   | -0.78   | -0.78   | -0.90   | -0.91   | -0.86   | -0.88   |
| D(31,29,30,33) | 179.15  | 179.68  | 179.67  | 179.60  | 179.58  | 179.59  | 179.60  | 179.46  | 179.44  | 179.38  | 179.34  |
| D(28,29,31,34) | 179.25  | 179.05  | 179.12  | 179.02  | 179.00  | 179.01  | 179.05  | 179.32  | 179.12  | 179.20  | 179.21  |
| D(28,29,31,35) | 0.92    | 0.79    | 0.87    | 0.78    | 0.76    | 0.78    | 0.82    | 1.03    | 0.85    | 0.90    | 0.90    |
| D(30,29,31,34) | 0.58    | 0.31    | 0.33    | 0.36    | 0.36    | 0.36    | 0.36    | 0.49    | 0.50    | 0.50    | 0.52    |
| D(30,29,31,35) | -177.74 | -177.95 | -177.91 | -177.88 | -177.88 | -177.87 | -177.87 | -177.79 | -177.77 | -177.80 | -177.79 |
| D(29,30,32,36) | 0.60    | 0.67    | 0.67    | 0.65    | 0.65    | 0.65    | 0.65    | 0.66    | 0.68    | 0.61    | 0.61    |
| D(33,30,32,36) | -179.47 | -179.76 | -179.78 | -179.71 | -179.70 | -179.71 | -179.73 | -179.69 | -179.67 | -179.63 | -179.60 |
| D(29,31,34,36) | 0.00    | 0.17    | 0.17    | 0.12    | 0.12    | 0.12    | 0.12    | 0.08    | 0.07    | 0.03    | 0.03    |
| D(29,31,34,37) | -179.49 | -179.31 | -179.33 | -179.34 | -179.34 | -179.34 | -179.34 | -179.38 | -179.38 | -179.43 | -179.44 |
| D(35,31,34,36) | 178.35  | 178.45  | 178.44  | 178.38  | 178.38  | 178.38  | 178.38  | 178.39  | 178.35  | 178.36  | 178.36  |
| D(35,31,34,37) | -1.15   | -1.04   | -1.05   | -1.08   | -1.07   | -1.08   | -1.08   | -1.08   | -1.10   | -1.11   | -1.11   |
| D(30,32,36,34) | 0.05    | -0.13   | -0.11   | -0.12   | -0.12   | -0.11   | -0.11   | -0.02   | -0.05   | 0.00    | 0.00    |
| D(30,32,36,38) | 179.73  | 179.56  | 179.57  | 179.58  | 179.58  | 179.58  | 179.58  | 179.62  | 179.61  | 179.66  | 179.67  |
| D(31,34,36,32) | -0.34   | -0.28   | -0.30   | -0.26   | -0.26   | -0.26   | -0.27   | -0.34   | -0.32   | -0.31   | -0.32   |
| D(31,34,36,38) | -180.00 | -179.96 | -179.97 | -179.94 | -179.94 | -179.94 | -179.95 | -179.97 | -179.96 | -179.95 | -179.97 |
| D(37,34,36,32) | 179.15  | 179.21  | 179.20  | 179.20  | 179.20  | 179.20  | 179.20  | 179.13  | 179.13  | 179.16  | 179.16  |
| D(37,34,36,38) | -0.50   | -0.47   | -0.47   | -0.48   | -0.48   | -0.48   | -0.48   | -0.50   | -0.50   | -0.49   | -0.49   |
